# Supplementary material for: Scale and shape issues in focused cluster power for count data
Source: PubMed Central journal article supplement (PMC1079923; doi:10.1186/1476-072x-4-8), 2005-03-31
Supplement: 1476-072X-4-8-S2.pdf [file 1476-072X-4-8-S2.pdf]

1) DD, where:  $\theta = 0.5[1 + \exp(-\alpha_1 d)]$

$d$  =distance

2) PDD, where:  $\theta = 0.5[1 + \exp\{(\alpha_2 \log(d)) - (\alpha_1 d)\}]$

3) DIR, where:  $\theta = 0.5[1 + \exp\{(\alpha_3 \cos(\phi - \mu)) + (\alpha_4 \sin(\phi - \mu))\}]$

$\phi$  = the angle of emission distribution from the pollution source to each regional centroid and  $\mu$  is the estimated mean angle.

4) DDIR, where:  $\theta = 0.5[1 + \exp\{(\alpha_3 \cos(\phi - \mu)) + (\alpha_4 \sin(\phi - \mu)) - (\alpha_1 d)\}]$

5) PDDIR, where:

$$\theta = 0.5[1 + \exp\{(\alpha_3 \cos(\phi - \mu)) + (\alpha_4 \sin(\phi - \mu)) + (\alpha_2 \log(d)) - (\alpha_1 d)\}]$$
